# Supplementary material
Source: PubMed Central journal article supplement (PMC4649145)
Supplement: AAC.01793-15_zac012154662so1.pdf [file AAC.01793-15_zac012154662so1.pdf]

## Increased Hydrolysis of Oximino- $\beta$ -Lactams by CMY-107, a Tyr199Cys Mutant of CMY-2 Produced by *Escherichia coli*

S. D. Kotsakis, V. Miriagou, E. Bozavoutoglou, E. E. Vetouli, E. Lebessi, E. Tzelepi, L. S. Tzouvelekis

### Supplemental Material

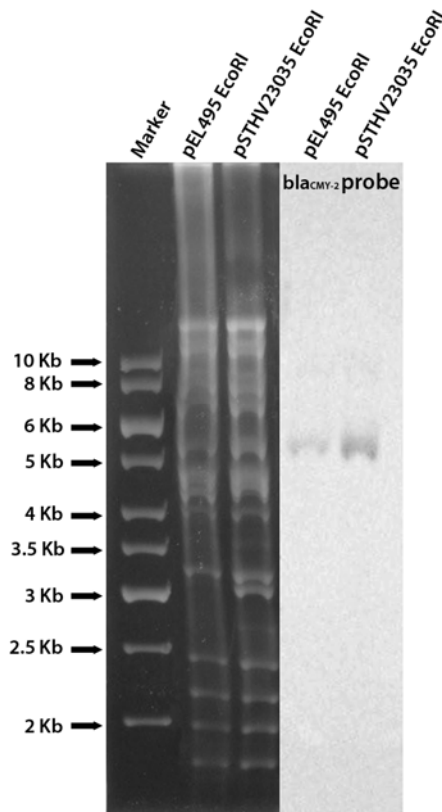

**Figure S1:** Comparison between the RFLP profiles of pEL495 (*bla*<sub>CMY-107</sub>; *E. coli*) and pSTHV23035 (*bla*<sub>CMY-2</sub>; *S. enterica* sv. Typhimurium) *IncI* plasmids. The two plasmids share a highly similar *EcoRI* restriction electrophoretic profile (left part). In addition a *bla*<sub>CMY</sub> specific probe hybridized with a common fragment (~5500 bp) of both plasmids (right part).

**Table S1:** Primers used in sequencing reactions of pEL495

| Primer   | Sequence (5'-3')        | Target*                                        | Ref        |
|----------|-------------------------|------------------------------------------------|------------|
| E9       | GAGAAAGAGGCTGTCAG       | nt2384-2400; <i>bla</i> <sub>CMY</sub> reverse | 1          |
| CITM-F   | TGGCCAGAACTGACAGGCAAA   | nt2687-2707; <i>bla</i> <sub>CMY</sub> forward | 2          |
| CITM-R   | TTTCTCCTGAACGTGGCTGGC   | nt3128-3148; <i>bla</i> <sub>CMY</sub> reverse | 2          |
| E4/F     | TGGGTTCAGGCCAACATGGATGC | nt3107-3129; <i>bla</i> <sub>CMY</sub> forward | 3          |
| SugE-R   | GCCTGATATGTCCTGGATCGT   | nt4424-4444; <i>sugE</i> forward               | 3          |
| SugE-Rin | CATAAGCGGTTTCCTACAGG    | nt4260-4278; <i>sugE</i> reverse               | this study |
| TrbA/Fw  | CGACAAATGCTTCCGGGGT     | nt6214-6232; <i>trbA</i> reverse               | 4          |

\* Numbering according to sequence GQ398239 (GenBank)

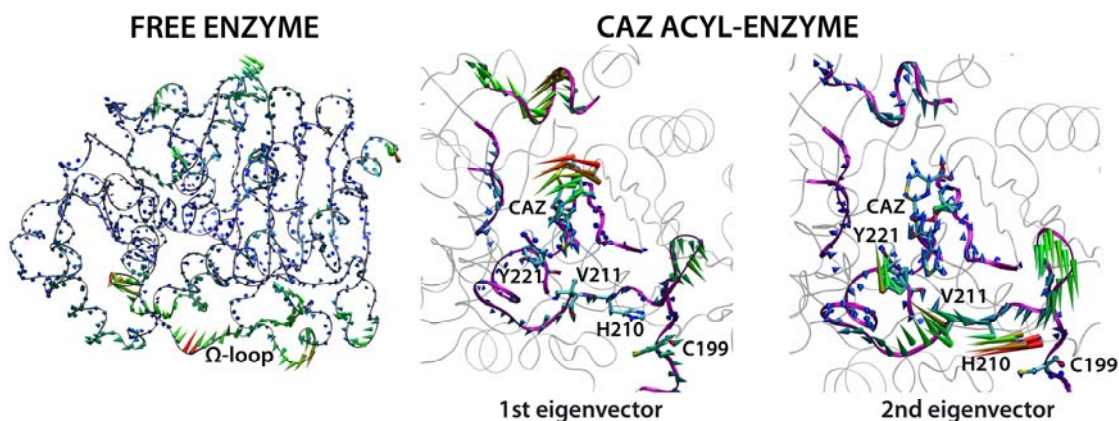

**Figure S2:** Porcupine plots of principle movements observed in the free enzyme of CMY-107 and in its CAZ acyl-enzyme (the projections of the first two eigenvectors are shown). Secondary structures forming the edges of the active site as well as the bound substrate in CMY-107 had similar dynamic properties with those of ES 211 variants of CMY-2, CMY-30 and CMY-42, that differed from the respective ones of the parental enzyme in respect of both intensity and direction (published elsewhere; 5).

## References

1. Kotsakis SD, Tzouvelekis LS, Lebessi E, Doudoulakakis A, Bouli T, Tzelepi E, Miriagou V. 2015. Characterization of a mobilizable IncQ plasmid encoding cephalosporinase CMY-4 in *Escherichia coli*. *Antimicrob. Agents Chemother.* **59**: 2964-2966.
2. Perez-Perez FJ, Hanson ND. 2002. Detection of plasmid-mediated *ampC*  $\beta$ -lactamase genes in clinical isolates by using multiplex PCR. *J. Antimicrob. Chemother.* **40**:2153-2162.
3. D'Andrea MM, Literacka E, Zioga A, Giani T, Baraniak A, Fiett J, Sadowy E, Tassios PT, Rossolini GM, Gniadkowski M, Miriagou V. 2011. Evolution and spread of a multidrug-resistant *Proteus mirabilis* clone with chromosomal AmpC-type cephalosporinases in Europe. *Antimicrob. Agents Chemother.* **55**: 2735-2742
4. García-Fernández A, Chiaretto G, Bertini A, Villa L, Fortini D, Ricci A, Carattoli A. 2008. Multilocus sequence typing of Inc11 plasmids carrying extended-spectrum beta-lactamases in *Escherichia coli* and *Salmonella* of human and animal origin. *J. Antimicrob. Chemother.* **61**: 1229-1233
5. Kotsakis SD, Caselli E, Tzouvelekis LS, Petinaki E, Prati F, Miriagou V. 2013. Interactions of oximino-substituted boronic acids and beta-lactams with the CMY-2-derived extended-spectrum cephalosporinases CMY-30 and CMY-42. *Antimicrob. Agents Chemother.* **57**: 968-976
